# Supplementary material for: Gender differences in health-related quality of life associated with abdominal obesity in a Korean population
Source: HighWire-hosted journal article supplement (doi:10.1136/bmjopen-2013-003954), 2014-01-01
Supplement: bmjopen-2013-003954supp.pdf [file bmjopen-2013-003954supp.pdf]

Prevalence of any problem in each domain of EQ-5D  
According to BMI category (%)

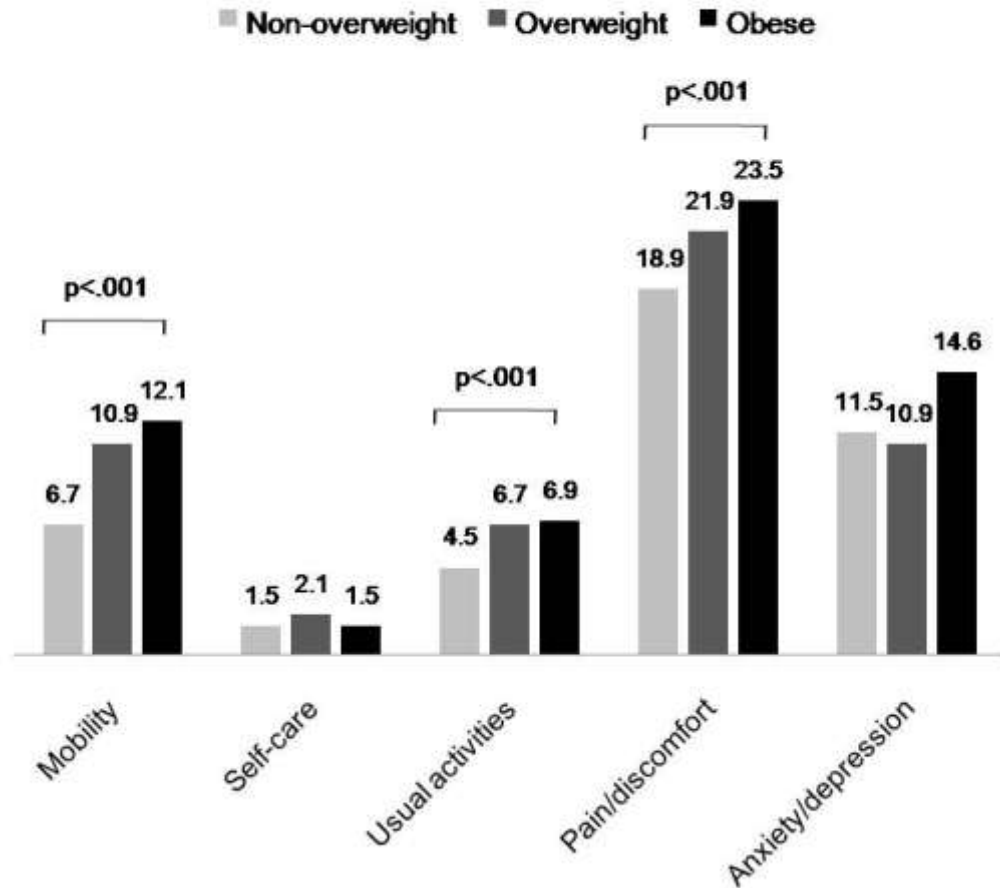

**Supplemental Figure 1.** Prevalence of any problem in each domain of EQ-5D according to BMI category (N=13,754)

BMI, body mass index

P-values are obtained by chi-square tests

Prevalence of any problem in each domain of EQ-5D  
According to WC category (%)

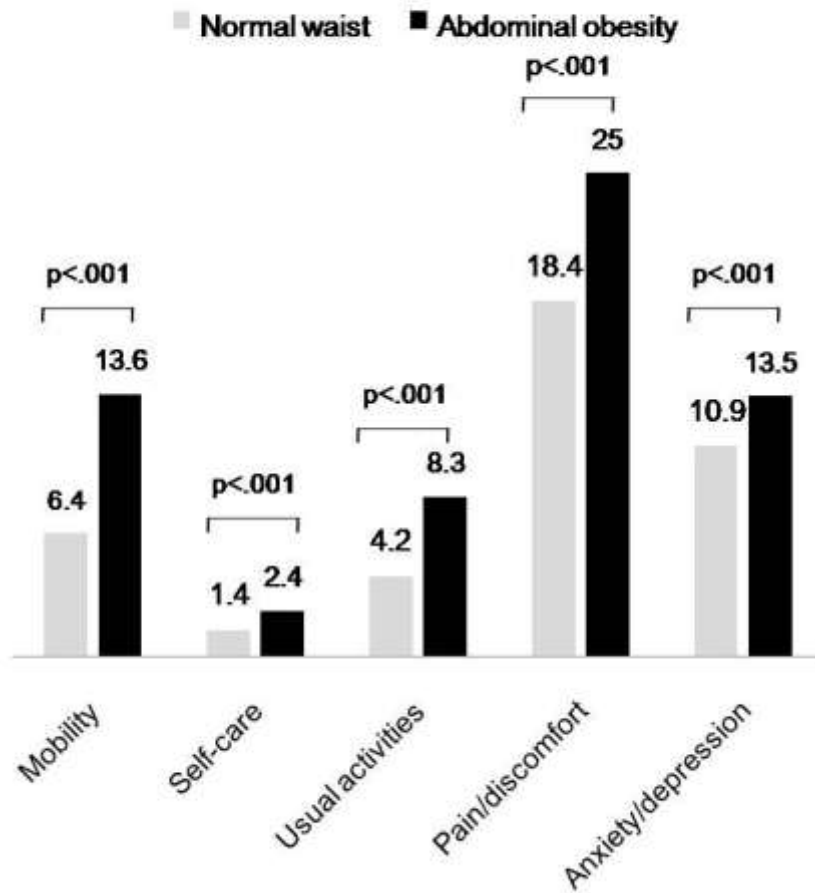

**Supplemental Figure 2.** Prevalence of any problem in each domain of EQ-5D according to WC category (N=13,754)

WC, waist circumference

P-values are obtained by chi-square tests

Supplemental Table 1. Crude associations between BMI category and each domain of EQ-5D by gender (N=13,754)

|                    | Men (n=5,922)  |              |             |                      | Women (n=7,832) |              |            |                      |
|--------------------|----------------|--------------|-------------|----------------------|-----------------|--------------|------------|----------------------|
|                    | Non-overweight | Overweight   | obese       | p-value <sup>a</sup> | Non-overweight  | Overweight   | obese      | p-value <sup>a</sup> |
| Mobility           |                |              |             | .127                 |                 |              |            | <.001                |
| Any problem        | 253(5.3)       | 158 (6.7)    | 16 (6.6)    |                      | 530 (7.9)       | 361 (17.8)   | 62 (18.2)  |                      |
| None               | 3,366 (94.7)   | 1,830 (93.3) | 209 (92.4)  |                      | 5,38 (92.1)     | 1,414 (82.2) | 244 (81.8) |                      |
| Self-care          |                |              |             | -                    |                 |              |            | <.001                |
| Any problem        | 75 (1.6)       | 35 (1.5)     | 0 (0.0)     |                      | 101 (1.5)       | 59 (3.0)     | 14 (3.3)   |                      |
| None               | 3,544 (98.4)   | 1,953 (98.5) | 225 (100.0) |                      | 5,567 (98.5)    | 1,716 (97.0) | 292 (96.7) |                      |
| Usual activities   |                |              |             | .801                 |                 |              |            | <.001                |
| Any problem        | 186 (3.9)      | 98 (4.1)     | 8 (3.1)     |                      | 341 (5.0)       | 213 (10.9)   | 42 (11.3)  |                      |
| None               | 3,433 (96.1)   | 1,890 (95.9) | 217 (96.9)  |                      | 5,327 (95.0)    | 1,562 (89.1) | 264 (88.7) |                      |
| Pain/discomfort    |                |              |             | .945                 |                 |              |            | <.001                |
| Any problem        | 604 (15.2)     | 327 (15.6)   | 33 (15.5)   |                      | 1,324 (22.1)    | 591 (32.4)   | 104 (32.5) |                      |
| None               | 3,014 (84.8)   | 1,661 (84.4) | 192 (84.5)  |                      | 4,344 (77.9)    | 1,184 (67.6) | 202 (67.5) |                      |
| Anxiety/depression |                |              |             | .111                 |                 |              |            | <.001                |
| Any problem        | 282 (7.2)      | 121 (5.6)    | 16 (8.1)    |                      | 864 (15.2)      | 337 (19.5)   | 64 (21.8)  |                      |
| None               | 3,337 (92.8)   | 1,867 (94.4) | 209 (91.9)  |                      | 4,804 (84.3)    | 1,438 (81.5) | 242 (78.2) |                      |

BMI=body mass index

<sup>a</sup>Significance levels analyzed with chi-square tests

Supplemental Table 2. Multivariate associations between BMI category and each domain of EQ-5D by gender (N=13,754)

|                    | Odds ratio (95% confidence interval) |                          |                   |                 |                          |                          |
|--------------------|--------------------------------------|--------------------------|-------------------|-----------------|--------------------------|--------------------------|
|                    | Men (n=5,922)                        |                          |                   | Women (n=7,832) |                          |                          |
|                    | Non-overweight                       | Overweight               | Obese             | Non-overweight  | Overweight               | Obese                    |
| Mobility           | reference                            | <b>1.3 (1.02 – 1.65)</b> | 1.2 (0.59 – 2.61) | reference       | <b>1.4 (1.18 – 1.69)</b> | <b>1.6 (1.10 – 2.38)</b> |
| Self-care          | reference                            | 1.0 (0.60 – 1.61)        | 0.0 (0.00 – 0.00) | reference       | 1.0 (0.68 – 1.54)        | 1.1 (0.59 – 2.11)        |
| Usual activities   | reference                            | 1.1 (0.80 – 1.55)        | 0.6 (0.22 – 1.79) | reference       | <b>1.3 (1.01 – 1.62)</b> | 1.4 (0.90 – 2.22)        |
| Pain/discomfort    | reference                            | 1.0 (0.82 – 1.18)        | 1.0 (0.66 – 1.57) | reference       | <b>1.2 (1.07 – 1.44)</b> | 1.3 (0.93 – 1.76)        |
| Anxiety/depression | reference                            | 0.8 (0.61 – 0.99)        | 1.2 (0.67 – 2.18) | reference       | 1.1 (0.90 – 1.27)        | 1.3 (0.88 – 1.78)        |

BMI=body mass index

Odds ratios (95% confidence interval) are from logistic regression models after adjusting for age, education, income, employment, marital status, no. of co-morbidities, and an interaction term between gender and BMI category

Supplemental Table 3. Crude associations between WC category and each domain of EQ-5D by gender (N=13,754)

|                    | Men (n=5,922) |                   |                      | Women (n=7,832) |                   |                      |
|--------------------|---------------|-------------------|----------------------|-----------------|-------------------|----------------------|
|                    | Normal waist  | Abdominal obesity | p-value <sup>a</sup> | Normal waist    | Abdominal obesity | p-value <sup>a</sup> |
| Mobility           |               |                   | <.001                |                 |                   | <.001                |
| Any problem        | 280 (5.2)     | 145 (7.7)         |                      | 521 (7.6)       | 431 (20.8)        |                      |
| None               | 3,996 (94.8)  | 1,409 (92.3)      |                      | 5,368 (92.4)    | 1,422 (79.2)      |                      |
| Self-care          |               |                   | .727                 |                 |                   | <.001                |
| Any problem        | 81 (1.4)      | 28 (1.6)          |                      | 99 (1.4)        | 75 (3.4)          |                      |
| None               | 4,195 (98.6)  | 1,526 (98.4)      |                      | 5,790 (98.6)    | 1,778 (96.6)      |                      |
| Usual activities   |               |                   | .140                 |                 |                   | <.001                |
| Any problem        | 203 (3.7)     | 87 (4.6)          |                      | 327 (4.8)       | 268 (12.8)        |                      |
| None               | 4,073 (96.3)  | 1,467 (95.4)      |                      | 5,562 (95.2)    | 1,585 (87.2)      |                      |
| Pain/discomfort    |               |                   | .036                 |                 |                   | <.001                |
| Any problem        | 682 (14.6)    | 279 (17.1)        |                      | 1,338 (22.0)    | 679 (34.7)        |                      |
| None               | 3,593 (85.3)  | 1,275 (82.9)      |                      | 4,551 (78.0)    | 1,174 (65.3)      |                      |
| Anxiety/depression |               |                   | .717                 |                 |                   | <.001                |
| Any problem        | 316 (6.8)     | 103 (6.5)         |                      | 871 (14.8)      | 393 (22.0)        |                      |
| None               | 3,960 (93.2)  | 1,451 (93.5)      |                      | 5,018 (85.2)    | 1,460 (78.0)      |                      |

WC=waist circumference

<sup>a</sup>Significance levels analyzed with chi-square tests

Supplemental Table 4. Multivariate associations between WC category and each domain of EQ-5D by gender (N=13,754)

| Sub-domains        | Odds ratio (95% confidence interval) |                   |                 |                          |
|--------------------|--------------------------------------|-------------------|-----------------|--------------------------|
|                    | Men (n=5,922)                        |                   | Women (n=7,832) |                          |
|                    | Normal waist                         | Abdominal obesity | Normal waist    | Abdominal obesity        |
| Mobility           | reference                            | 1.1 (0.82 – 1.49) | reference       | <b>1.3 (1.13 – 1.74)</b> |
| Self-care          | reference                            | 0.9 (0.47 – 1.81) | reference       | 1.2 (0.81 – 1.91)        |
| Usual activities   | reference                            | 1.1 (0.74 – 1.65) | reference       | <b>1.5 (1.11 – 1.95)</b> |
| Pain/discomfort    | reference                            | 1.1 (0.86 – 1.28) | reference       | <b>1.3 (1.08 – 1.51)</b> |
| Anxiety/depression | reference                            | 1.0 (0.74 – 1.29) | reference       | <b>1.3 (1.08 – 1.59)</b> |

WC=waist circumference

Odds ratios (95% confidence interval) are from logistic regression models after adjusting for age, education, income, employment, marital status, and no. of co-morbidities, and an interaction term between gender and WC category
